# Supplementary material for: Comparing feature selection and machine learning approaches for predicting CYP2D6 methylation from genetic variation
Source: Front Neuroinform. 2024 Feb 21;17:1244336. doi: 10.3389/fninf.2023.1244336 (PMC10915285; doi:10.3389/fninf.2023.1244336)
Supplement: Supplementary file 2 [file Table_2.xlsx]

## Sheet: Sheet1
Supplementary 3_CYP2D6_CpG8_annotation
TargetID	chr	pos	Type	Relation_to_Island	UCSC_RefGene_Name	UCSC_RefGene_Group
cg04692870	chr22	42525206	II	Island	CYP2D6;CYP2D6	Body;Body
cg07016288	chr22	42525748	II	Island	CYP2D6;CYP2D6	Body;Body
cg09322432	chr22	42527611	II	S_Shore	CYP2D6;CYP2D6	TSS1500;TSS1500
cg10840135	chr22	42526619	II	S_Shore	CYP2D6;CYP2D6	1stExon;1stExon
cg15597984	chr22	42527061	II	S_Shore	CYP2D6;CYP2D6	TSS200;TSS200
cg17498424	chr22	42528123	II	S_Shelf	CYP2D6;CYP2D6	TSS1500;TSS1500
cg20046859	chr22	42524596	II	N_Shore	CYP2D6;CYP2D6	Body;Body
cg22650942	chr22	42527158	II	S_Shore	CYP2D6;CYP2D6	TSS1500;TSS1500
