# Supplementary material for: Comparing feature selection and machine learning approaches for predicting CYP2D6 methylation from genetic variation
Source: Front Neuroinform. 2024 Feb 21;17:1244336. doi: 10.3389/fninf.2023.1244336 (PMC10915285; doi:10.3389/fninf.2023.1244336)
Supplement: Supplementary file 3 [file Table_3.xlsx]

## Sheet: Sheet1
					Supplementary 4_complete list of SNP rsIDs after MAF<10%
Feature set 1: GWAS - mQTLs from 75% of GUSTO samples															Feature set 2: GTEx database	Feature set 3: 41.5Mb - 43.6Mb range
1.1: Before B-H correction										1.2: After B-H correction
1.1.1. CpG probe cg04692870	1.1.2. CpG probe cg07016288	1.1.3. CpG probe cg09322432	1.1.4. CpG probe cg10840135	1.1.5. CpG probe cg15597984	1.1.6. CpG probe cg17498424	1.1.7. CpG probe cg20046859	1.1.8. CpG probe cg22650942	1.1.9. Combining SNPs for above eight CpG probes (duplicates removed)	1.2.1. CpG probe cg04692870	1.2.3. CpG probe cg09322432	1.2.4. CpG probe cg10840135	1.2.5. CpG probe cg15597984	1.2.7. CpG probe cg20046859	1.2.9. Combining SNPs for above eight CpG probes (duplicates removed)
rs2079586	rs4819922	rs4819880	rs5994173	rs5748639	rs2041696	rs2399153	rs75397198	rs2079586	rs133335	rs73885718	rs114309992	rs139533	rs762995	rs133335	rs116099340	rs5751043
rs5993996	rs2385784	rs4819921	rs737962	rs5746899	rs2005571	rs34288001	rs2381106	rs5993996	rs133344	rs5758165	rs76550409	rs5751117		rs133344	rs4822007	rs4822004
rs2385714	rs5748755	rs5748929	rs423158	rs4819893	rs9606640	rs2005572	rs5748664	rs2385714		rs5758166		rs5758487		rs73885718	rs4822010	rs6002260
rs9306239	rs5748760	rs10427995	rs8135914	rs5746902	rs9306251	rs5748979	rs7286672	rs9306239		rs114309992		rs4269017		rs5758165	rs1569858	rs5751045
rs5994032	rs11089387	rs5994193	rs737831	rs73159896	rs361626	rs174345	rs5748972	rs5994032		rs76550409		rs5758689		rs5758166	rs20551	rs2267426
rs165726	rs5748766	rs5748979	rs4819665	rs9618892	rs5992041	rs412830	rs8141904	rs165726		rs5751117		rs762995		rs114309992	rs4820431	rs5751046
rs165651	rs9618954	rs8141904	rs380554	rs5749028	rs181390	rs438858	rs5747205	rs165651		rs5758487		rs134906		rs76550409	rs4822011	rs77965463
rs758221	rs57129060	rs12628227	rs5747925	rs5747175	rs1210637	rs423158	rs9605311	rs758221		rs4269017				rs5751117	rs1033611	rs5995996
rs5747057	rs5748790	rs2522289	rs963180	rs5747198	rs712966	rs2535692	rs174348	rs5747057		rs762995				rs5758487	rs4822013	rs13058113
rs5992654	rs1076106	rs5746414	rs5993834	rs174345	rs807745	rs4819627	rs174354	rs5992654		rs134906				rs4269017	rs2057070	rs738629
rs5747059	rs4239865	rs2535692	rs5993871	rs412830	rs13447289	rs382013	rs5992103	rs5747059		rs6002674				rs762995	rs9611509	rs7284319
rs9605252	rs9606682	rs2098472	rs12483995	rs737831	rs17209532	rs436087	rs623679	rs9605252						rs134906	rs9607779	rs738630
rs5749032	rs9605264	rs738095	rs60321341	rs200662947	rs5748423	rs443435	rs651851	rs5749032						rs6002674	rs5751060	rs738631
rs9619055	rs11705540	rs8135914	rs670708	rs5993501	rs5748428	rs4819665	rs200594896	rs9619055						rs139533	rs2076577	rs112624735
rs5749046	rs181408	rs737831	rs73879356	rs2800984	rs5746837	rs5992179	rs2629351	rs5749046						rs5758689	rs2076581	rs2064558
rs67203878	rs8135914	rs5992122	rs9613603	rs712966	rs2073766	rs60794954	rs165924	rs67203878							rs136394	rs2144342
rs7290503	rs737831	rs5992873	rs9613614	rs11550628	rs5748449	rs73879356	rs55763104	rs7290503							rs2038208	rs5758235
rs5747205	rs4819665	rs367922	rs368014	rs7289913	rs580204	rs564493	rs117569920	rs5747205							rs4822016	rs5758236
rs5747281	rs361809	rs456198	rs11089871	rs11913696	rs372236	rs8135829	rs386036	rs5747281							rs11913442	rs4822005
rs465101	rs143832616	rs200662947	rs4822406	rs200317923	rs1210575	rs4820551	rs2877023	rs465101							rs5758257	rs5758237
rs361898	rs9618446	rs13447289	rs2154592	rs5748487	rs5755074	rs368014	rs6001256	rs361898							rs2038209	rs5758238
rs4819778	rs2525038	rs963180	rs2186362	rs933269	rs9607363	rs9622750	rs28376962	rs4819778							rs136401	rs4822006
rs5992481	rs9618476	rs5993838	rs62233115	rs406086	rs762473	rs762473	rs2275985	rs5992481							rs9623345	rs11090041
rs12483857	rs712966	rs5748449	rs5761074	rs73877146	rs9611215	rs76973969	rs6519506	rs12483857							rs5751062	rs8138205
rs165879	rs73158875	rs2531704	rs695317	rs701449	rs11090169	rs5757004	rs62233115	rs165879							rs139431	rs8137709
rs1108101	rs12628898	rs373747	rs6004896	rs373747	rs4822404	rs7291227	rs762283	rs1108101							rs4820432	rs5758240
rs7285254	rs8135829	rs854961	rs5761355	rs640836	rs131328	rs139751	rs5760537	rs7285254							rs139432	rs3818120
rs113621676	rs5996655	rs73879356	rs3088103	rs759577	rs1783111	rs688700	rs2330984	rs113621676							rs139434	rs738632
rs178092	rs385427	rs13433634	rs4822801	rs362031	rs131351	rs9306425	rs2267088	rs178092							rs139435	rs5758241
rs5750426	rs5756714	rs1557798	rs2516088	rs738084	rs2298372	rs5761798	rs5761600	rs5750426							rs139436	rs73176607
rs11089871	rs762473	rs9613603	rs62223977	rs165687	rs6004047	rs5761811	rs10483127	rs11089871							rs139437	rs113673125
rs6002827	rs5750563	rs9613614	rs6005433	rs2110412	rs2001180	rs8135943	rs1011772	rs6002827							rs139438	rs11912447
rs8137688	rs4822404	rs421390	rs4364106	rs2629351	rs5760500	rs134935	rs1028283	rs8137688							rs139439	rs17002301
rs4822537	rs4822406	rs140496	rs5762264	rs5996655	rs5752008	rs5761931	rs114862246	rs4822537							rs7290378	rs116099340
rs131483	rs9624216	rs5750426	rs2040699	rs178044	rs7291051	rs1883117	rs5762175	rs131483							rs7289286	rs35669783
rs11703103	rs5760260	rs11089871	rs2343417	rs178092	rs713678	rs760529	rs9625262	rs11703103							rs7290545	rs2064560
rs6004342	rs5751888	rs762473	rs11912549	rs28372939	rs2092048	rs6005319	rs434737	rs6004342							rs7289861	rs5751048
rs6004386	rs5760485	rs60568604	rs6005605	rs4820728	rs576585	rs9608598	rs9613878	rs6004386							rs5758262	rs35823862
rs1467387	rs28363865	rs6003389	rs5762348	rs421390	rs2103527	rs8137262	rs62226062	rs1467387							rs139440	rs5758242
rs2301504	rs5751930	rs418064	rs2283847	rs4822404	rs6004781	rs5763003	rs5753481	rs2301504							rs139441	rs5758243
rs59628284	rs5760713	rs4822406	rs695459	rs2330512	rs9613044	rs117560457	rs3788488	rs59628284							rs139445	rs13053662
rs7287491	rs139739	rs2330498	rs7289516	rs131359	rs650293	rs5753008	rs1365837	rs7287491							rs8141477	rs4822007
rs8140999	rs139751	rs9612385	rs5994317	rs131385	rs5761492	rs1476576	rs241715	rs8140999							rs12169035	rs2267427
rs472985	rs4822642	rs2298372	rs5997694	rs5760029	rs8135056	rs9606955	rs5998822	rs472985							rs139447	rs9611503
rs760593	rs6004869	rs5761074	rs4820878	rs2154593	rs514593	rs1981469	rs2032475	rs760593							rs139448	rs4820428
rs573155	rs9613066	rs79091	rs3959619	rs9608256	rs933246	rs9621684	rs130503	rs573155							rs3818003	rs147140858
rs61376987	rs9608441	rs660997	rs5753472	rs6519506	rs5997127	rs11704104	rs11089672	rs61376987							rs139450	rs4822010
rs4820765	rs6004896	rs664457	rs2858344	rs62233115	rs5761883	rs6518824	rs2142691	rs4820765							rs139451	rs9611505
rs434737	rs5997067	rs641099	rs4821139	rs1883995	rs134935	rs239336	rs2413244	rs434737							rs139453	rs1569858
rs2283847	rs5761732	rs8135154	rs6518824	rs5752008	rs1883117	rs1844463	rs7284847	rs2283847							rs139454	rs5751050
rs1974480	rs9613266	rs35912665	rs20301	rs6004422	rs7287491	rs4630866	rs743814	rs1974480							rs139456	rs5751051
rs174724	rs74369801	rs677619	rs16992592	rs7289318	rs5752516	rs134274	rs16995880	rs174724							rs139457	rs5758246
rs6006176	rs9608598	rs1573709	rs240333	rs760738	rs1569826	rs8137488	rs2073198	rs6006176							rs139458	rs35121045
rs56686185	rs12484986	rs5761931	rs80228	rs641099	rs4822897	rs116652822	rs4369966	rs56686185							rs8139263	rs59568053
rs28715	rs1547014	rs4822879	rs4630866	rs737774	rs2064506	rs136147	rs5995262	rs28715							rs13058265	rs147996339
rs28716	rs4823003	rs12628909	rs19445	rs136561	rs9625262	rs2228703	rs2284026	rs28716							rs13054131	rs2273227
rs4821138	rs78095489	rs9620702	rs470032	rs16983406	rs73162335	rs2283973	rs35080096	rs4821138							rs139462	rs17002316
rs2075921	rs13053986	rs4364106	rs6518958	rs59433790	rs134028	rs2235320	rs131835	rs2075921							rs139463	rs20551
rs5754559	rs2301816	rs5762264	rs116652822	rs7287491	rs186316219	rs739189	rs741999	rs5754559							rs85220	rs116736991
rs2032475	rs3208937	rs134019	rs5750142	rs479694	rs134096	rs5756649	rs36117095	rs2032475							rs139465	rs4820431
rs4239871	rs72617296	rs134021	rs6000026	rs572159	rs5762733	rs80256394	rs5756531	rs4239871							rs2273085	rs4822011
rs239316	rs2108108	rs9306447	rs2413422	rs111904907	rs17507045	rs78578442	rs5756533	rs239316							rs5758264	rs5758248
rs130575	rs5754153	rs695459	rs5750326	rs10854810	rs5763243	rs77740651	rs5750424	rs130575							rs139470	rs66776572
rs2187756	rs9621643	rs7289516	rs2413433	rs5752869	rs16988402	rs5756729	rs78578442	rs2187756							rs5758265	rs20554
rs6000144	rs240333	rs5752934	rs41280005	rs132381	rs16988410	rs8141621	rs8140986	rs6000144							rs5758266	rs79458245
rs2075938	rs2267251	rs5749071	rs11089816	rs3959619	rs2240422	rs2235338	rs135721	rs2075938							rs2179744	rs1033611
rs2075725	rs240082	rs135414	rs6519043	rs7284474	rs2269964	rs4821670	rs117773903	rs2075725							rs139475	rs4822013
rs2413435	rs2283940	rs61693297	rs5756649	rs7288964	rs11704494	rs4821676	rs7287160	rs2413435							rs139478	rs3788583
rs55703759	rs16993143	rs5998425	rs78578442	rs2232184	rs11703808	rs28612128	rs5757725	rs55703759							rs3721	rs8136962
rs5756705	rs5754783	rs62239312	rs77740651	rs5753820	rs9606878	rs4821767	rs80208362	rs5756705							rs139481	rs58268766
rs12167035	rs16994116	rs2858226	rs4821676	rs2858226	rs12484711	rs5756982	rs5015453	rs12167035							rs139484	rs2057070
rs4821676	rs7284847	rs9619281	rs28612128	rs137350	rs2281032	rs6001840	rs8137847	rs4821676							rs139485	rs2294976
rs8135778	rs11703757	rs538204036	rs8138628	rs137393	rs131069	rs73885718	rs133335	rs8135778							rs139492	rs5751058
rs139873	rs132659	rs5749481	rs6000881	rs137414	rs10854628	rs5758165	rs133344	rs139873							rs139493	rs9611509
rs2075983	rs136200	rs56103417	rs2267387	rs6518824	rs5754227	rs5758166	rs77713470	rs2075983							rs9611525	rs6002271
rs135763	rs2239782	rs9607033	rs12167283	rs80442	rs11913403	rs5758222	rs137069	rs135763							rs139506	rs12160751
rs17000956	rs4820232	rs11704104	rs12628833	rs1580226	rs3788488	rs114309992	rs2413758	rs17000956							rs139515	rs9607779
rs2007418	rs739097	rs6518824	rs11704319	rs2187756	rs112576317	rs76550409	rs138131	rs2007418							rs6519249	rs5751060
rs9611155	rs4820254	rs130431	rs5757725	rs1961917	rs137373	rs139517	rs130313	rs9611155							rs139535	rs2076577
rs1807560	rs5750326	rs5994940	rs5750871	rs4549216	rs5754733	rs5751117	rs2748865	rs1807560							rs1984584	rs34711608
rs73887476	rs735563	rs8140392	rs2294368	rs28415553	rs5754809	rs5758487	rs949441	rs73887476							rs7289932	rs9611510
rs5758152	rs6000476	rs6518943	rs2064258	rs28407014	rs5994827	rs4269017	rs9614830	rs5758152							rs1807590	rs2076578
rs62237051	rs2413433	rs5756162	rs73165039	rs5750165	rs5999196	rs5758689	rs133801	rs62237051							rs13053356	rs2076580
rs5758186	rs2075725	rs739097	rs138049	rs5995204	rs5754850	rs762995	rs133800	rs5758186							rs6002333	rs2076581
rs59568053	rs41280005	rs5756239	rs6002199	rs136147	rs5999686	rs134906	rs133750	rs59568053							rs3927	rs2076582
rs133335	rs11089816	rs2228703	rs73885718	rs9622420	rs2187961	rs1548304	rs4823343	rs133335							rs4822021	rs35082633
rs133344	rs5995384	rs2413422	rs5758165	rs2179051	rs138786	rs6002674	rs136889	rs133344							rs6002337	rs5758251
rs77713470	rs2899285	rs6519043	rs5758166	rs11089816	rs11703934	rs4820460	rs763213	rs77713470							rs9611556	rs12628695
rs2856955	rs5756728	rs228955	rs5758186	rs71328603	rs926755	rs4822243	rs11912248	rs2856955							rs2143695	rs136394
rs769261	rs2076371	rs228963	rs5758222	rs5756982	rs739097	rs58801561	rs3788610	rs769261							rs8137373	rs4408817
rs742158	rs58759442	rs5756533	rs114309992	rs7288826	rs5756210	rs2076160	rs6007424	rs742158							rs2235845	rs2143694
rs136983	rs17298479	rs2899285	rs76550409	rs2092410	rs2413406	rs9623797	rs132813	rs136983							rs5758301	rs2038208
rs5751413	rs470078	rs5750400	rs139517	rs7287160	rs5756441	rs12484304	rs136027	rs5751413							rs4822022	rs4822016
rs2899374	rs12628833	rs78578442	rs5751117	rs2009999	rs2281096	rs7290575	rs737822	rs2899374							rs5751080	rs115525262
rs16991431	rs11704319	rs77740651	rs73163336	rs136828	rs8141621	rs2269668	rs73177006	rs16991431							rs4822023	rs118064759
rs12170196	rs12627761	rs58759442	rs5758487	rs2284077	rs4821670	rs739309	rs4253750	rs12170196							rs2281332	rs136399
rs62231501	rs137675	rs5757299	rs4269017	rs138014	rs2284057	rs2051580	rs135669	rs62231501							rs2281333	rs35546986
rs12158259	rs3747177	rs9622979	rs59993856	rs138049	rs139873	rs4134426	rs136064	rs12158259							rs9619963	rs136400
rs98175	rs1807560	rs470078	rs77713470	rs5995910	rs11912714	rs4073875	rs136081	rs98175							rs57711468	rs2092563
rs916401	rs137700	rs12628833	rs5758689	rs6002199	rs2103514	rs4073965	rs4436	rs916401							rs7287294	rs11913442
rs9626518	rs4820383	rs11704319	rs762995	rs5758131	rs760726	rs143107308	rs8137792	rs9626518							rs738499	rs5758257
rs9614980	rs72619519	rs137700	rs6002673	rs5758152	rs7287160	rs4575817	rs877528	rs9614980							rs5758321	rs2038209
rs6006909	rs5995992	rs5757725	rs6002674	rs73885718	rs138049	rs9626091	rs2064803	rs6006909							rs9611571	rs140062613
rs6007424	rs560434518	rs136828	rs4820460	rs5758165	rs138050	rs139138	rs9615668	rs6007424							rs4822028	rs136401
rs8138218	rs59993856	rs5750871	rs150388166	rs5758166	rs17344701	rs4823208	rs135299	rs8138218							rs2273071	rs11704286
rs2235152	rs762995	rs2294368	rs61392936	rs114309992	rs115525262	rs9614421	rs6008630	rs2235152							rs2073167	rs9623345
rs136718	rs134906	rs138016	rs9623589	rs8136962	rs11090060	rs9614430	rs133655	rs136718							rs132903	rs8138990
rs5765519	rs6002673	rs2958654	rs12484304	rs76550409	rs9607848	rs12159191	rs6519988	rs5765519							rs9611579	rs5751062
rs10448593	rs17003024	rs2064258	rs2269668	rs139533	rs9607850	rs4499536	rs2337497	rs10448593							rs2009960	rs11703115
rs113613788	rs5759168	rs6001840	rs739309	rs5751117	rs4269017	rs112861115	rs5771651	rs113613788							rs2899345	rs136402
rs7290614	rs5759274	rs138049	rs4073965	rs5758487	rs2856955	rs136674	rs8136155	rs7290614							rs5758341	rs139431
rs5769338	rs17003642	rs6002020	rs373317258	rs4269017	rs769261	rs9614630	rs5771863	rs5769338							rs5758342	rs4820432
rs12484929	rs713788	rs6002199	rs528080806	rs5758689	rs1041878	rs5765250	rs62225912	rs12484929							rs9611588	rs139432
rs9615144	rs739016	rs5758131	rs139138	rs762995	rs8139941	rs5764781	rs2873698	rs9615144							rs9611589	rs139434
rs713999	rs5759343	rs5758152	rs12170196	rs134906	rs13055057	rs7284208	rs742977	rs713999							rs8136635	rs139435
rs130868	rs4591439	rs73885718	rs6007195	rs6002674	rs742158	rs4823314	rs9627810	rs130868							rs202637	rs139436
rs130869	rs867104	rs5758165	rs9614630	rs4820460	rs9623588	rs5765585	rs136790	rs130869							rs9607805	rs139437
rs6008226	rs2413764	rs5758166	rs2673095	rs150388166	rs34074034	rs138177	rs5021272	rs6008226							rs11912852	rs139438
rs9615659	rs5759356	rs5758186	rs5765250	rs61392936	rs737612	rs8141212	rs134452	rs9615659							rs1799932	rs139439
rs1988711	rs4134426	rs5758222	rs2071937	rs5758890	rs2899374	rs28601573		rs1988711							rs9619974	rs7290378
rs112755208	rs142620747	rs114309992	rs8135295	rs5758894	rs9680768	rs5767213		rs112755208							rs203316	rs7289286
rs133559	rs141389097	rs76550409	rs5768878	rs2269668	rs28547081	rs4253623		rs133559							rs2076198	rs7289294
rs4823514	rs734561	rs139517	rs6008957	rs2744881	rs139089	rs9626736		rs4823514							rs169407	rs7290545
rs6519988	rs5764491	rs5751117	rs801581	rs9614308	rs6006689	rs9284524		rs6519988							rs4822043	rs7289861
rs531091844	rs1004529	rs5758487	rs4823874	rs5764491	rs12170196	rs5768878		rs531091844							rs9607821	rs5758262
rs35568027	rs16991431	rs4269017	rs811668	rs1004529	rs139252	rs2142664		rs35568027							rs132762	rs139440
rs11090996	rs139190	rs5758689	rs17222768	rs12627908	rs138597	rs2024754		rs11090996							rs132800	rs139441
rs9616465	rs872927	rs762995	rs5767640	rs112328572	rs4499536	rs910548		rs9616465							rs132806	rs139443
rs5771299	rs713695	rs134906	rs761419	rs138620	rs2269539	rs6008957		rs5771299							rs11703145	rs139445
	rs11704451	rs6002673	rs9615659	rs138628	rs5766251	rs801581		rs4819922							rs62236556	rs8141477
	rs5765797	rs6002674	rs16998311	rs136889	rs5766263	rs4823874		rs2385784							rs2003816	rs12169035
	rs138575	rs4820460	rs80251587	rs136674	rs9615001	rs811668		rs5748755							rs2413652	rs139447
	rs5764910	rs7286414	rs133563	rs5766439	rs5766289	rs135134		rs5748760							rs2097413	rs139448
	rs3761485	rs73169171	rs56251255	rs760991	rs2350232	rs75599533		rs11089387							rs5758434	rs3818003
	rs132457	rs150388166	rs6519988	rs9616022	rs140555	rs9615659		rs5748766							rs13056216	rs139450
	rs132479	rs61392936	rs72619582	rs5768870	rs4823437	rs133563		rs9618954							rs62239561	rs139451
	rs5766388	rs75275430	rs13056230	rs6008890	rs12160642	rs36124357		rs57129060							rs2011053	rs139453
	rs547698	rs9623589	rs133464	rs809034	rs6007424	rs11704590		rs5748790							rs55906525	rs139454
	rs226522	rs8190368	rs133462	rs139585	rs73167234	rs5767109		rs1076106							rs1807669	rs139456
	rs2176039	rs130333	rs133451	rs17222768	rs132857	rs5768556		rs4239865							rs738422	rs139457
	rs62231104	rs739309	rs6008760	rs5766716	rs7286061	rs16998984		rs9606682							rs2064189	rs139458
	rs7290896	rs28517761	rs5771940	rs133576	rs5766698	rs4390855		rs9605264							rs5751144	rs8139263
	rs5764781	rs4073965	rs12166645	rs6008610	rs12484501	rs17707481		rs11705540							rs2413656	rs12163322
	rs713781	rs4823164	rs5770123	rs10854849	rs136638	rs762970		rs181408							rs13054514	rs139461
	rs10448598	rs2299849	rs12484264	rs7291899	rs9615638	rs5771940		rs8135914							rs11090057	rs13058265
	rs4072104	rs139081	rs968517	rs11704590	rs5767992	rs28667050		rs737831							rs5758440	rs13054131
	rs5767282	rs9614421	rs131707	rs133616	rs2208122	rs62225912		rs4819665							rs5758441	rs139462
	rs910548	rs9614428	rs131705	rs9615896	rs5768344	rs848741		rs361809							rs5758442	rs139463
	rs136125	rs5765895	rs6010035	rs13057452	rs9626807	rs6009641		rs143832616							rs5758447	rs85220
	rs5767566	rs73171572		rs910579	rs133559	rs5770843		rs9618446							rs5758449	rs9611519
	rs6007792	rs9614630		rs130158	rs71314845	rs5771049		rs2525038							rs1883368	rs9611520
	rs16998311	rs6007060		rs130169	rs6519988	rs131707		rs9618476							rs5758452	rs59195669
	rs135288	rs6007062		rs131969	rs9615322	rs6010044		rs712966							rs7291082	rs139465
	rs202145427	rs5764752		rs5771785	rs74753377			rs73158875							rs17377643	rs139466
	rs7291899	rs56187421		rs11705594	rs132217			rs12628898							rs5751151	rs139467
	rs6008659	rs6007662		rs71311647	rs131971			rs8135829							rs4401299	rs139468
	rs968517	rs9615375		rs4331618	rs11090953			rs5996655							rs2064188	rs2273085
	rs28372448	rs5768878		rs55841406	rs4140463			rs385427							rs2413659	rs139469
	rs11547731	rs9615376		rs742976	rs713727			rs5756714							rs8139203	rs5758264
	rs576210266	rs801581		rs12484264	rs8136975			rs762473							rs6519287	rs139470
	rs5770905	rs4823874		rs7288862	rs135789			rs5750563							rs6519288	rs79543
	rs131707	rs811668		rs6009436	rs139784			rs4822404							rs5996064	rs5758265
	rs131705	rs200006845		rs7292709	rs6009880			rs4822406							rs9623450	rs79545
	rs6010035	rs59213655		rs74906866	rs6010043			rs9624216							rs5751159	rs5758266
		rs2187792		rs780594145				rs5760260							rs5758466	rs76550409
		rs136638		rs62234012				rs5751888							rs11090059	rs2179744
		rs136641		rs139784				rs5760485							rs11090060	rs56361238
		rs5767640		rs28372448				rs28363865							rs139556	rs139475
		rs12166623		rs131820				rs5751930							rs12628731	rs139478
		rs6008290		rs6009953				rs5760713							rs139557	rs139480
		rs4823510						rs139739							rs139558	rs3721
		rs5768350						rs139751							rs738247	rs139481
		rs5767076						rs4822642							rs139559	rs139483
		rs133563						rs6004869							rs4822052	rs139484
		rs762970						rs9613066							rs1983554	rs139485
		rs5771940						rs9608441							rs738248	rs9611522
		rs4925438						rs6004896							rs12166503	rs5751070
		rs12166645						rs5997067							rs5996067	rs139492
		rs12484264						rs5761732							rs139565	rs139493
		rs62223367						rs9613266							rs7292782	rs4820434
		rs7285186						rs74369801							rs9619997	rs139496
		rs9616446						rs9608598							rs5996069	rs139497
		rs73185576						rs12484986							rs4820445	rs9611525
		rs5770310						rs1547014							rs6002503	rs3171692
		rs968517						rs4823003							rs139568	rs2267428
		rs4824056						rs78095489							rs139569	rs1983631
		rs2272848						rs13053986							rs4822053	rs9611527
		rs2013430						rs2301816							rs6002505	rs139499
		rs140999088						rs3208937							rs7364123	rs11703267
		rs5770843						rs72617296							rs7364180	rs9611528
								rs2108108							rs8137791	rs139503
								rs5754153							rs8138849	rs7364221
								rs9621643							rs7285782	rs104974
								rs240333							rs5758487	rs139506
								rs2267251							rs9611674	rs139507
								rs240082							rs13057991	rs139508
								rs2283940							rs1569451	rs4820435
								rs16993143							rs7287010	rs2235849
								rs5754783							rs9607850	rs1883858
								rs16994116							rs5996074	rs139510
								rs7284847							rs2267438	rs139511
								rs11703757							rs2267439	rs139512
								rs132659							rs4269017	rs139513
								rs136200							rs2284082	rs139515
								rs2239782							rs1883205	rs5751071
								rs4820232							rs7288536	rs5751072
								rs739097							rs7288838	rs2235850
								rs4820254							rs4501042	rs139516
								rs5750326							rs6519293	rs139517
								rs735563							rs6519294	rs2284079
								rs6000476							rs2413660	rs2413639
								rs2413433							rs12170228	rs35445172
								rs41280005							rs8140722	rs2235851
								rs11089816							rs2267440	rs139520
								rs5995384							rs719440	rs139521
								rs2899285							rs133280	rs13057249
								rs5756728							rs133281	rs2281337
								rs2076371							rs714015	rs5758273
								rs58759442							rs133286	rs5758274
								rs17298479							rs2269657	rs139525
								rs470078							rs133287	rs5751074
								rs12628833							rs133290	rs139526
								rs11704319							rs133291	rs6519249
								rs12627761							rs2267442	rs139528
								rs137675							rs2269658	rs139529
								rs3747177							rs1052717	rs9611540
								rs137700							rs2284084	rs60171
								rs4820383							rs2267443	rs5758280
								rs72619519							rs5758504	rs5996011
								rs5995992							rs763263	rs6002310
								rs560434518							rs7290134	rs139533
								rs59993856							rs12158335	rs9611542
								rs762995							rs9620001	rs139535
								rs134906							rs6002546	rs8139705
								rs6002673							rs1894713	rs8139784
								rs17003024							rs5758511	rs9611543
								rs5759168							rs6002548	rs1969666
								rs5759274							rs6002552	rs5758286
								rs17003642							rs3752591	rs1535048
								rs713788							rs1023498	rs1984584
								rs739016							rs1023499	rs13056986
								rs5759343							rs1023500	rs5996013
								rs4591439							rs7293091	rs6519250
								rs867104							rs6002555	rs5996014
								rs2413764							rs6002556	rs368180176
								rs5759356							rs5996092	rs186698961
								rs4134426							rs5751182	rs9607789
								rs142620747							rs5996094	rs6002318
								rs141389097							rs2187959	rs8138006
								rs734561							rs7285557	rs5751076
								rs5764491							rs4822069	rs2024566
								rs1004529							rs4822071	rs4822020
								rs139190							rs62240996	rs55658582
								rs872927							rs6002560	rs6002323
								rs713695							rs6002561	rs61298040
								rs11704451							rs1984419	rs1883825
								rs5765797							rs5996096	rs1883826
								rs138575							rs2899350	rs1883827
								rs5764910							rs4822076	rs7289932
								rs3761485							rs6519298	rs9611548
								rs132457							rs739292	rs34011394
								rs132479							rs5751191	rs62238178
								rs5766388							rs4820451	rs9611550
								rs547698							rs739293	rs9611553
								rs226522							rs763260	rs1807590
								rs2176039							rs5758527	rs6002328
								rs62231104							rs4822077	rs9611555
								rs7290896							rs5751194	rs13057907
								rs5764781							rs5751195	rs13053356
								rs713781							rs739294	rs5758295
								rs10448598							rs133292	rs6002333
								rs4072104							rs133293	rs3927
								rs5767282							rs133294	rs4822021
								rs910548							rs133295	rs6002337
								rs136125							rs11090065	rs9611556
								rs5767566							rs4820454	rs2143695
								rs6007792							rs6519301	rs8137373
								rs16998311							rs133298	rs2235845
								rs135288							rs56234624	rs5751078
								rs202145427							rs133299	rs5751079
								rs7291899							rs2097561	rs5758301
								rs6008659							rs2097562	rs4822022
								rs968517							rs133300	rs5758302
								rs28372448							rs739296	rs5751080
								rs11547731							rs133301	rs2294978
								rs576210266							rs7290907	rs5758303
								rs5770905							rs133302	rs1883828
								rs131707							rs1062753	rs4822023
								rs131705							rs133304	rs3817998
								rs6010035							rs133305	rs5758305
								rs4819880							rs133306	rs17002407
								rs4819921							rs8138080	rs2281329
								rs5748929							rs133307	rs2281330
								rs10427995							rs9623489	rs5758306
								rs5994193							rs5758537	rs2281331
								rs5748979							rs133308	rs2281332
								rs8141904							rs11090066	rs3817999
								rs12628227							rs129853	rs5751083
								rs2522289							rs129855	rs2281333
								rs5746414							rs129857	rs7290404
								rs2535692							rs5751197	rs5758307
								rs2098472							rs6002571	rs9611560
								rs738095							rs9611700	rs5758308
								rs5992122							rs133313	rs12484074
								rs5992873							rs133314	rs1109151
								rs367922							rs133315	rs5758309
								rs456198							rs133317	rs28638318
								rs200662947							rs133318	rs5758310
								rs13447289							rs133319	rs5751084
								rs963180							rs59993856	rs2294979
								rs5993838							rs133321	rs9538
								rs5748449							rs133322	rs6002351
								rs2531704							rs133323	rs74862880
								rs373747							rs133324	rs4822024
								rs854961							rs4822081	rs5758311
								rs73879356							rs133325	rs9607798
								rs13433634							rs133326	rs9611562
								rs1557798							rs133327	rs5758313
								rs9613603							rs133328	rs4820437
								rs9613614							rs133329	rs5758314
								rs421390							rs133330	rs5751085
								rs140496							rs9611710	rs5758315
								rs60568604							rs12166549	rs5758316
								rs6003389							rs9611711	rs5758317
								rs418064							rs9611712	rs4820438
								rs2330498							rs133331	rs9611565
								rs9612385							rs133332	rs9611566
								rs2298372							rs133333	rs5751086
								rs5761074							rs5758550	rs9611567
								rs79091							rs2413664	rs9619963
								rs660997							rs9607868	rs5758319
								rs664457							rs4822082	rs56660236
								rs641099							rs133335	rs5751087
								rs8135154							rs133336	rs57711468
								rs35912665							rs133337	rs9611569
								rs677619							rs133338	rs7287294
								rs1573709							rs133339	rs73176682
								rs5761931							rs133341	rs78348625
								rs4822879							rs133344	rs738499
								rs12628909							rs133346	rs2234052
								rs9620702							rs133348	rs2234053
								rs4364106							rs133350	rs5758321
								rs5762264							rs133351	rs9607799
								rs134019							rs5758553	rs2234058
								rs134021							rs5751204	rs2234059
								rs9306447							rs133352	rs767593
								rs695459							rs4822084	rs138557967
								rs7289516							rs133353	rs73176686
								rs5752934							rs133355	rs111763257
								rs5749071							rs133356	rs73176689
								rs135414							rs6002586	rs9611570
								rs61693297							rs133357	rs11546403
								rs5998425							rs34277770	rs9607800
								rs62239312							rs5758559	rs9611571
								rs2858226							rs10854749	rs9611572
								rs9619281							rs5758563	rs73176692
								rs538204036							rs5751209	rs28604950
								rs5749481							rs1063392	rs4822027
								rs56103417							rs2854837	rs73176694
								rs9607033							rs2413666	rs5758324
								rs11704104							rs133367	rs4822028
								rs6518824							rs133368	rs5758325
								rs130431							rs133369	rs2273071
								rs5994940							rs133370	rs60119330
								rs8140392							rs133371	rs74484224
								rs6518943							rs133373	rs2073167
								rs5756162							rs133374	rs5758327
								rs5756239							rs133376	rs9611576
								rs2228703							rs133377	rs9611577
								rs2413422							rs28605764	rs132901
								rs6519043							rs5758573	rs132902
								rs228955							rs133379	rs132903
								rs228963							rs133380	rs202645
								rs5756533							rs76392259	rs132905
								rs5750400							rs13057094	rs75784
								rs78578442							rs78725400	rs169364
								rs77740651							rs133383	rs9611579
								rs5757299							rs16947	rs5758330
								rs9622979							rs1065852	rs5758331
								rs5757725							rs28515621	rs143500677
								rs136828							rs2743455	rs5758332
								rs5750871							rs2743456	rs5758333
								rs2294368							rs56404506	rs5758334
								rs138016							rs2743458	rs132907
								rs2958654							rs1800754	rs5758335
								rs2064258							rs2267446	rs132908
								rs6001840							rs3021083	rs132909
								rs138049							rs1807314	rs5751094
								rs6002020							rs36093924	rs132911
								rs6002199							rs3021082	rs132912
								rs5758131							rs56023519	rs132914
								rs73885718							rs2856955	rs132915
								rs5758165							rs2854740	rs132917
								rs5758166							rs769261	rs132918
								rs5758222							rs2743461	rs202634
								rs114309992							rs3021076	rs202635
								rs76550409							rs3020731	rs132920
								rs139517							rs2856957	rs202659
								rs5751117							rs4467371	rs132921
								rs5758487							rs5758605	rs132922
								rs4269017							rs5751226	rs202661
								rs5758689							rs5758606	rs202662
								rs6002674							rs5751227	rs202663
								rs4820460							rs2899354	rs202664
								rs7286414							rs5758618	rs202665
								rs73169171							rs760648	rs202666
								rs150388166							rs5758629	rs2009960
								rs61392936							rs2413684	rs202667
								rs75275430							rs5758632	rs2899345
								rs9623589							rs9607885	rs5758341
								rs8190368							rs2899355	rs5758342
								rs130333							rs5758635	rs5758344
								rs739309							rs9611755	rs5758345
								rs28517761							rs6002655	rs2413643
								rs4073965							rs5758684	rs2413644
								rs4823164							rs134866	rs5751100
								rs2299849							rs134867	rs420071
								rs139081							rs134868	rs36100462
								rs9614421							rs134869	rs12165508
								rs9614428							rs134870	rs2142505
								rs5765895							rs134871	rs8136682
								rs73171572							rs134872	rs5758347
								rs9614630							rs5758686	rs6002378
								rs6007060							rs739146	rs6002379
								rs6007062							rs134874	rs6002380
								rs5764752							rs134877	rs6002381
								rs56187421							rs5758688	rs202613
								rs6007662							rs134878	rs202614
								rs9615375							rs5758689	rs188057
								rs5768878							rs55644935	rs202617
								rs9615376							rs1107553	rs202618
								rs801581							rs134880	rs202619
								rs4823874							rs1001587	rs9611588
								rs811668							rs1001586	rs202620
								rs200006845							rs134882	rs202622
								rs59213655							rs739147	rs9611589
								rs2187792							rs134883	rs202623
								rs136638							rs80504	rs202624
								rs136641							rs762995	rs202625
								rs5767640							rs134886	rs5751101
								rs12166623							rs134887	rs5758349
								rs6008290							rs134888	rs7285041
								rs4823510							rs134891	rs9611591
								rs5768350							rs134894	rs5758350
								rs5767076							rs129472	rs202641
								rs133563							rs762997	rs202642
								rs762970							rs86669	rs2011790
								rs5771940							rs86670	rs79005
								rs4925438							rs134897	rs5758351
								rs12166645							rs134898	rs202652
								rs12484264							rs134899	rs202653
								rs62223367							rs134901	rs106860
								rs7285186							rs134902	rs202654
								rs9616446							rs5758698	rs202657
								rs73185576							rs134903	rs202626
								rs5770310							rs134904	rs202628
								rs4824056							rs9611766	rs202629
								rs2272848							rs134906	rs202630
								rs2013430							rs6002673	rs79008
								rs140999088							rs5996139	rs202636
								rs5770843							rs11704558	rs8136635
								rs5994173							rs8137939	rs5758361
								rs737962							rs5758703	rs169363
								rs423158							rs6002676	rs202637
								rs380554							rs11090082	rs9607805
								rs5747925							rs4822101	rs202638
								rs5993834							rs4822102	rs5751107
								rs5993871							rs4822103	rs5751108
								rs12483995							rs4822104	rs5758365
								rs60321341							rs4820459	rs6002385
								rs670708							rs4822105	rs6002386
								rs368014							rs9623555	rs79009
								rs2154592							rs8140842	rs5758366
								rs2186362							rs8135132	rs5758368
								rs62233115							rs9623557	rs202631
								rs695317							rs6002677	rs11705068
								rs5761355							rs4822106	rs505533
								rs3088103							rs2157296	rs2267431
								rs4822801							rs1041878	rs19573
								rs2516088							rs4822108	rs79011
								rs62223977							rs8139941	rs727563
								rs6005433							rs6002679	rs11912852
								rs2040699							rs13055057	rs5758370
								rs2343417							rs6002682	rs5758371
								rs11912549							rs6002683	rs5758372
								rs6005605							rs4820460	rs2267432
								rs5762348							rs6002685	rs2267433
								rs5994317							rs6002686	rs169361
								rs5997694							rs11090083	rs2267434
								rs4820878							rs35248349	rs5751114
								rs3959619							rs34873446	rs2267435
								rs5753472							rs1008194	rs2076196
								rs2858344							rs11704435	rs2284081
								rs4821139							rs4822109	rs5751117
								rs20301							rs1107526	rs17002487
								rs16992592							rs2413685	rs2076199
								rs80228							rs2157297	rs137831
								rs4630866							rs2157298	rs2267436
								rs19445							rs73169171	rs1799932
								rs470032							rs36141542	rs9619974
								rs6518958							rs5758709	rs203320
								rs116652822							rs5751263	rs17367716
								rs5750142							rs5751264	rs203319
								rs6000026							rs8142108	rs203318
								rs5756649							rs9623566	rs1960182
								rs28612128							rs73886046	rs17367849
								rs8138628							rs9620039	rs203316
								rs6000881							rs1041879	rs4822032
								rs2267387							rs73433593	rs1810460
								rs12167283							rs6002693	rs1810461
								rs73165039							rs7288008	rs73178626
								rs73163336							rs6002695	rs2076198
								rs12484304							rs4820461	rs4822033
								rs2269668							rs4820462	rs4822034
								rs373317258							rs8141151	rs9611606
								rs528080806							rs8141373	rs116959331
								rs139138							rs59781921	rs5751123
								rs6007195							rs2157294	rs5758384
								rs2673095							rs73169193	rs56319767
								rs5765250							rs11090087	rs73178632
								rs2071937							rs80185137	rs169407
								rs8135295							rs2071775	rs12483991
								rs6008957							rs57028529	rs4822035
								rs17222768							rs73886063	rs4822036
								rs761419							rs61018143	rs12483786
								rs80251587							rs41277487	rs5758386
								rs56251255							rs11090090	rs12484228
								rs72619582							rs11090091	rs11554327
								rs13056230							rs11090092	rs28623192
								rs133464							rs11090093	rs9607812
								rs133462							rs10854752	rs9607813
								rs133451							rs11090094	rs5758388
								rs6008760							rs6002713	rs5758389
								rs5770123							rs6002714	rs73178638
								rs5748639							rs6002715	rs56904812
								rs5746899							rs1077870	rs8138232
								rs4819893							rs73173015	rs13058723
								rs5746902							rs111272670	rs4822037
								rs73159896							rs5751273	rs9611609
								rs9618892							rs5758730	rs9607814
								rs5749028							rs5751276	rs5751124
								rs5747175							rs113054100	rs9611611
								rs5747198							rs5751279	rs76930421
								rs174345							rs5758739	rs9607816
								rs412830							rs4822133	rs56364401
								rs5993501							rs2839705	rs5751125
								rs2800984							rs5758742	rs12484175
								rs11550628							rs3788594	rs5758391
								rs7289913								rs1972057
								rs11913696								rs12484722
								rs200317923								rs9607818
								rs5748487								rs12484467
								rs933269								rs4822038
								rs406086								rs4822039
								rs73877146								rs9611612
								rs701449								rs9611613
								rs640836								rs12483860
								rs759577								rs567380043
								rs362031								rs9611615
								rs738084								rs73178647
								rs165687								rs7290990
								rs2110412								rs5996037
								rs2629351								rs5996038
								rs178044								rs2064164
								rs28372939								rs6002408
								rs4820728								rs1006407
								rs2330512								rs4822043
								rs131359								rs4481089
								rs131385								rs5996039
								rs5760029								rs9607821
								rs2154593								rs2076200
								rs9608256								rs4822045
								rs6519506								rs9611619
								rs1883995								rs4822046
								rs5752008								rs57102627
								rs6004422								rs4822047
								rs7289318								rs4822048
								rs760738								rs28750375
								rs737774								rs4822049
								rs136561								rs8139993
								rs16983406								rs148894219
								rs59433790								rs5751127
								rs479694								rs80477
								rs572159								rs132761
								rs111904907								rs132762
								rs10854810								rs132765
								rs5752869								rs132767
								rs132381								rs8135299
								rs7284474								rs7284839
								rs7288964								rs132768
								rs2232184								rs5751129
								rs5753820								rs132770
								rs137350								rs5758397
								rs137393								rs5751131
								rs137414								rs132771
								rs80442								rs5758398
								rs1580226								rs132776
								rs1961917								rs132779
								rs4549216								rs9611636
								rs28415553								rs132781
								rs28407014								rs5751135
								rs5750165								rs11090053
								rs5995204								rs132784
								rs136147								rs132786
								rs9622420								rs132787
								rs2179051								rs132790
								rs71328603								rs34077262
								rs5756982								rs111953426
								rs7288826								rs132792
								rs2092410								rs132793
								rs7287160								rs132796
								rs2009999								rs132797
								rs2284077								rs132798
								rs138014								rs132800
								rs5995910								rs5758402
								rs8136962								rs132802
								rs139533								rs132803
								rs5758890								rs132804
								rs5758894								rs132805
								rs2744881								rs8779
								rs9614308								rs132806
								rs12627908								rs132807
								rs112328572								rs1807497
								rs138620								rs1811113
								rs138628								rs949438
								rs136889								rs7285944
								rs136674								rs5996050
								rs5766439								rs11703145
								rs760991								rs5758404
								rs9616022								rs5758405
								rs5768870								rs5758406
								rs6008890								rs5758408
								rs809034								rs5758409
								rs139585								rs6519270
								rs5766716								rs5758411
								rs133576								rs2157287
								rs6008610								rs13055632
								rs10854849								rs13055804
								rs11704590								rs13057349
								rs133616								rs13056262
								rs9615896								rs62236556
								rs13057452								rs5758415
								rs910579								rs5758416
								rs130158								rs10775759
								rs130169								rs5758420
								rs131969								rs739134
								rs5771785								rs2003816
								rs11705594								rs11090056
								rs71311647								rs2413652
								rs4331618								rs5758426
								rs55841406								rs5758427
								rs742976								rs2097413
								rs7288862								rs1988153
								rs6009436								rs5758430
								rs7292709								rs5758431
								rs74906866								rs5758434
								rs780594145								rs13056216
								rs62234012								rs62239561
								rs139784								rs2011053
								rs131820								rs55906525
								rs6009953								rs1807669
								rs2041696								rs738422
								rs2005571								rs2092274
								rs9606640								rs5758437
								rs9306251								rs2064189
								rs361626								rs5751144
								rs5992041								rs2413656
								rs181390								rs13054514
								rs1210637								rs11090057
								rs807745								rs5758440
								rs17209532								rs5758441
								rs5748423								rs5758442
								rs5748428								rs5758447
								rs5746837								rs5758449
								rs2073766								rs1883368
								rs580204								rs5758452
								rs372236								rs7291082
								rs1210575								rs17377643
								rs5755074								rs5758457
								rs9607363								rs5751151
								rs9611215								rs4401299
								rs11090169								rs2064188
								rs131328								rs2413659
								rs1783111								rs8139203
								rs131351								rs6519287
								rs6004047								rs6519288
								rs2001180								rs76636806
								rs5760500								rs5996064
								rs7291051								rs73163324
								rs713678								rs9623450
								rs2092048								rs5751159
								rs576585								rs5758466
								rs2103527								rs560434518
								rs6004781								rs139540
								rs9613044								rs126092
								rs650293								rs11090059
								rs5761492								rs73163336
								rs8135056								rs73163337
								rs514593								rs8136343
								rs933246								rs7292780
								rs5997127								rs139553
								rs5761883								rs5758474
								rs134935								rs11090060
								rs1883117								rs139556
								rs5752516								rs12628731
								rs1569826								rs139557
								rs4822897								rs139558
								rs2064506								rs738247
								rs9625262								rs139559
								rs73162335								rs4822052
								rs134028								rs1983554
								rs186316219								rs148205431
								rs134096								rs146134497
								rs5762733								rs738248
								rs17507045								rs12166503
								rs5763243								rs5996067
								rs16988402								rs139565
								rs16988410								rs7292782
								rs2240422								rs9619997
								rs2269964								rs5758479
								rs11704494								rs5996069
								rs11703808								rs4820445
								rs9606878								rs6002503
								rs12484711								rs73163358
								rs2281032								rs139568
								rs131069								rs139569
								rs10854628								rs5758482
								rs5754227								rs4822053
								rs11913403								rs6002505
								rs3788488								rs7364123
								rs112576317								rs7364180
								rs137373								rs8137791
								rs5754733								rs8138849
								rs5754809								rs7285782
								rs5994827								rs143291707
								rs5999196								rs5758487
								rs5754850								rs9607848
								rs5999686								rs9611674
								rs2187961								rs13057991
								rs138786								rs1569451
								rs11703934								rs73163373
								rs926755								rs7291578
								rs5756210								rs7287010
								rs2413406								rs9607850
								rs5756441								rs8137847
								rs2281096								rs5996074
								rs8141621								rs2267438
								rs4821670								rs2267439
								rs2284057								rs4269017
								rs11912714								rs2223261
								rs2103514								rs2284082
								rs760726								rs2255957
								rs138050								rs1883205
								rs17344701								rs7288536
								rs115525262								rs7288838
								rs11090060								rs59493447
								rs9607848								rs4501042
								rs9607850								rs539782514
								rs1041878								rs6519293
								rs8139941								rs6519294
								rs13055057								rs2413660
								rs9623588								rs60804715
								rs34074034								rs12170228
								rs737612								rs8140722
								rs9680768								rs2267440
								rs28547081								rs719440
								rs139089								rs133280
								rs6006689								rs133281
								rs139252								rs714015
								rs138597								rs133286
								rs4499536								rs2269657
								rs2269539								rs2017128
								rs5766251								rs133287
								rs5766263								rs133290
								rs9615001								rs133291
								rs5766289								rs5751174
								rs2350232								rs2267442
								rs140555								rs2269658
								rs4823437								rs1052717
								rs12160642								rs2284084
								rs73167234								rs2267443
								rs132857								rs5758504
								rs7286061								rs763263
								rs5766698								rs7290134
								rs12484501								rs12158335
								rs9615638								rs9620001
								rs5767992								rs6002546
								rs2208122								rs1894713
								rs5768344								rs5758511
								rs9626807								rs6002548
								rs71314845								rs6002552
								rs9615322								rs3752591
								rs74753377								rs1023498
								rs132217								rs1023499
								rs131971								rs1023500
								rs11090953								rs7293091
								rs4140463								rs6002555
								rs713727								rs6002556
								rs8136975								rs5996092
								rs135789								rs5751182
								rs6009880								rs5996094
								rs6010043								rs2187959
								rs2399153								rs7285557
								rs34288001								rs5751187
								rs2005572								rs4822069
								rs438858								rs4822071
								rs4819627								rs62240996
								rs382013								rs6002560
								rs436087								rs5751188
								rs443435								rs6002561
								rs5992179								rs1984419
								rs60794954								rs5751189
								rs564493								rs5996096
								rs4820551								rs2899350
								rs9622750								rs4822076
								rs76973969								rs6519298
								rs5757004								rs739292
								rs7291227								rs5751191
								rs688700								rs4820451
								rs9306425								rs739293
								rs5761798								rs763260
								rs5761811								rs5758527
								rs8135943								rs4822077
								rs760529								rs2269665
								rs6005319								rs5751194
								rs8137262								rs5751195
								rs5763003								rs739294
								rs117560457								rs133292
								rs5753008								rs133293
								rs1476576								rs133294
								rs9606955								rs133295
								rs1981469								rs11090065
								rs9621684								rs4820454
								rs239336								rs6519301
								rs1844463								rs133297
								rs134274								rs133298
								rs8137488								rs56234624
								rs2283973								rs133299
								rs2235320								rs2097561
								rs739189								rs2097562
								rs80256394								rs133300
								rs5756729								rs739296
								rs2235338								rs133301
								rs4821767								rs7290907
								rs1548304								rs133302
								rs4822243								rs1062753
								rs58801561								rs133304
								rs2076160								rs133305
								rs9623797								rs133306
								rs7290575								rs8138080
								rs2051580								rs133307
								rs4073875								rs9623489
								rs143107308								rs5758537
								rs4575817								rs133308
								rs9626091								rs11090066
								rs4823208								rs129853
								rs9614430								rs129855
								rs12159191								rs129857
								rs112861115								rs5751197
								rs7284208								rs6002571
								rs4823314								rs9611700
								rs5765585								rs133313
								rs138177								rs133314
								rs8141212								rs133315
								rs28601573								rs133317
								rs5767213								rs133318
								rs4253623								rs133319
								rs9626736								rs59993856
								rs9284524								rs133321
								rs2142664								rs133322
								rs2024754								rs133323
								rs135134								rs133324
								rs75599533								rs4822081
								rs36124357								rs133325
								rs5767109								rs133326
								rs5768556								rs133327
								rs16998984								rs133328
								rs4390855								rs133329
								rs17707481								rs133330
								rs28667050								rs9611710
								rs62225912								rs12166549
								rs848741								rs9611711
								rs6009641								rs5751201
								rs5771049								rs9611712
								rs6010044								rs133331
								rs75397198								rs133332
								rs2381106								rs133333
								rs5748664								rs5758550
								rs7286672								rs2413664
								rs5748972								rs9607868
								rs9605311								rs4822082
								rs174348								rs133335
								rs174354								rs133336
								rs5992103								rs133337
								rs623679								rs133338
								rs651851								rs133339
								rs200594896								rs133341
								rs165924								rs133344
								rs55763104								rs133346
								rs117569920								rs133348
								rs386036								rs133350
								rs2877023								rs133351
								rs6001256								rs5758553
								rs28376962								rs5751204
								rs2275985								rs133352
								rs762283								rs5758554
								rs5760537								rs5751206
								rs2330984								rs4822084
								rs2267088								rs133353
								rs5761600								rs133355
								rs10483127								rs10428005
								rs1011772								rs133356
								rs1028283								rs6002586
								rs114862246								rs133357
								rs5762175								rs34277770
								rs9613878								rs5758559
								rs62226062								rs77713470
								rs5753481								rs10854749
								rs1365837								rs5758563
								rs241715								rs5751209
								rs5998822								rs1063392
								rs130503								rs2854837
								rs11089672								rs2413666
								rs2142691								rs133367
								rs2413244								rs133368
								rs743814								rs133369
								rs16995880								rs133370
								rs2073198								rs133371
								rs4369966								rs133373
								rs5995262								rs133374
								rs2284026								rs133376
								rs35080096								rs133377
								rs131835								rs28605764
								rs741999								rs5758573
								rs36117095								rs133379
								rs5756531								rs133380
								rs5750424								rs76392259
								rs8140986								rs13057094
								rs135721								rs78725400
								rs117773903								rs133383
								rs80208362								rs16947
								rs5015453								rs1065852
								rs8137847								rs28515621
								rs137069								rs2743455
								rs2413758								rs2743456
								rs138131								rs915947
								rs130313								rs28733092
								rs2748865								rs56404506
								rs949441								rs2982055
								rs9614830								rs2743457
								rs133801								rs2743458
								rs133800								rs1800754
								rs133750								rs1058167
								rs4823343								rs2267446
								rs763213								rs3021083
								rs11912248								rs1807314
								rs3788610								rs36093924
								rs132813								rs3021082
								rs136027								rs56023519
								rs737822								rs2267448
								rs73177006								rs2856955
								rs4253750								rs2854740
								rs135669								rs769261
								rs136064								rs2743461
								rs136081								rs3021076
								rs4436								rs3020731
								rs8137792								rs2856957
								rs877528								rs4467371
								rs2064803								rs5758605
								rs9615668								rs5751226
								rs135299								rs5758606
								rs6008630								rs5751227
								rs133655								rs2899354
								rs2337497								rs5758618
								rs5771651								rs760648
								rs8136155								rs5758629
								rs5771863								rs2413684
								rs2873698								rs5758632
								rs742977								rs9607885
								rs9627810								rs2899355
								rs136790								rs5758635
								rs5021272								rs9611755
								rs134452								rs6002655
																rs5758684
																rs134866
																rs134867
																rs134868
																rs134869
																rs134870
																rs134871
																rs134872
																rs5758686
																rs134873
																rs739146
																rs134874
																rs134877
																rs5758688
																rs134878
																rs134879
																rs5758689
																rs55644935
																rs1107553
																rs134880
																rs1001587
																rs1001586
																rs134882
																rs739147
																rs134883
																rs80504
																rs762995
																rs134886
																rs134887
																rs134888
																rs134891
																rs134894
																rs129472
																rs762997
																rs86669
																rs86670
																rs134897
																rs134898
																rs134899
																rs134901
																rs134902
																rs5758698
																rs134903
																rs134904
																rs9611766
																rs134906
																rs1548304
																rs6002673
																rs5996139
																rs9623554
																rs6002674
																rs11704558
																rs8137939
																rs5758703
																rs6002676
																rs11090082
																rs4822101
																rs4822102
																rs4822103
																rs4822104
																rs4820459
																rs4822105
																rs9623555
																rs8140842
																rs8135132
																rs9623557
																rs6002677
																rs4822106
																rs2157296
																rs4822107
																rs1041878
																rs4822108
																rs8139941
																rs6002679
																rs13055057
																rs6002681
																rs6002682
																rs6002683
																rs5758706
																rs4820460
																rs6002685
																rs6002686
																rs11090083
																rs35248349
																rs34873446
																rs1008194
																rs11704435
																rs57163740
																rs4822109
																rs7286414
																rs1107526
																rs2413685
																rs2157297
																rs2157298
																rs1894538
																rs73169171
																rs36141542
																rs5758708
																rs5758709
																rs2227113
																rs5751263
																rs5751264
																rs5758710
																rs5758711
																rs5758712
																rs8142108
																rs4822111
																rs739149
																rs739150
																rs713804
																rs6002692
																rs9623566
																rs79463777
																rs73886046
																rs9620039
																rs185984512
																rs1041879
																rs73433593
																rs6002693
																rs2071773
																rs7288008
																rs6002695
																rs4820461
																rs4820462
																rs9611773
																rs2071774
																rs4822114
																rs6002698
																rs1023468
																rs4822116
																rs4820463
																rs4822118
																rs5996143
																rs8141021
																rs8141151
																rs8141373
																rs59781921
																rs9611774
																rs8142218
																rs2157294
																rs150388166
																rs12168548
																rs73169193
																rs8135582
																rs1011224
																rs11090087
																rs80185137
																rs5996145
																rs5996146
																rs189553558
																rs1023469
																rs4422240
																rs2071775
																rs146860263
																rs9607891
																rs58295490
																rs6002708
																rs4822119
																rs8141398
																rs4822120
																rs9607893
																rs9611782
																rs9607894
																rs9611783
																rs9607895
																rs57028529
																rs73886063
																rs9611784
																rs61018143
																rs4822121
																rs9623573
																rs2294361
																rs2294362
																rs41277487
																rs12484310
																rs11090090
																rs11090091
																rs11090092
																rs11090093
																rs10854752
																rs11090094
																rs6002713
																rs6002714
																rs6002715
																rs1057157
																rs1077870
																rs12484229
																rs12484478
																rs12484885
																rs74329479
																rs4822123
																rs61392936
																rs4822125
																rs146095933
																rs9607897
																rs17003024
																rs2076089
																rs145913496
																rs12484417
																rs11090096
																rs7289512
																rs75275430
																rs1005286
																rs9623580
																rs9623581
																rs9623583
																rs75939245
																rs2142831
																rs7292003
																rs11705417
																rs2179232
																rs2413689
																rs7291924
																rs2247576
																rs2072863
																rs2016721
																rs6002725
																rs6002727
																rs9607898
																rs11090099
																rs12484975
																rs9611788
																rs62239661
																rs17003056
																rs17003058
																rs8137110
																rs11090100
																rs9623586
																rs733278
																rs742158
																rs735537
																rs760723
																rs8139063
																rs6519319
																rs7288411
																rs73173015
																rs6002731
																rs9623588
																rs9623589
																rs6002733
																rs10854754
																rs9611791
																rs2092177
																rs2413690
																rs10048888
																rs2103580
																rs8141510
																rs8141826
																rs8139123
																rs4822129
																rs9620047
																rs6002737
																rs738305
																rs1016110
																rs111272670
																rs5758724
																rs5758727
																rs5751273
																rs55692813
																rs2899356
																rs5758729
																rs6002740
																rs5758730
																rs5751276
																rs5758731
																rs5758732
																rs2899357
																rs5751277
																rs9611801
																rs5758733
																rs113054100
																rs5758734
																rs5758735
																rs5758736
																rs5758737
																rs5751279
																rs5758739
																rs4822133
																rs2839705
																rs4822134
																rs5758742
																rs5758743
																rs9653845
																rs5751281
																rs4429562
																rs5758762
																rs5758763
																rs73173058
																rs2413692
																rs5758764
																rs73888326
																rs200196187
																rs137002
																rs137006
																rs137010
																rs28649290
																rs137012
																rs137013
																rs137014
																rs2003671
																rs5758770
																rs28464369
																rs2413693
																rs5751290
																rs114162817
																rs1056566
																rs1064877
																rs5758774
																rs5758775
																rs1812240
																rs5021907
																rs5758780
																rs78433467
																rs8137466
																rs2281105
																rs200991354
																rs5751295
																rs5758784
																rs9623617
																rs5758785
																rs5751299
																rs5758789
																rs13057873
																rs2038186
																rs4822161
																rs5758794
																rs5758796
																rs5751301
																rs5751302
																rs5758798
																rs186346720
																rs79118891
																rs113291895
																rs136983
																rs136986
																rs136987
																rs3939039
																rs136991
																rs5751306
																rs144361475
																rs137026
																rs8135177
																rs3788593
																rs137029
																rs564657889
																rs137030
																rs6002795
																rs60565735
																rs12628267
																rs137033
																rs137036
																rs137037
																rs77221604
																rs137038
																rs3747189
																rs137040
																rs12628680
																rs13058683
																rs60809407
																rs2018875
																rs137046
																rs61456769
																rs137050
																rs137051
																rs137053
																rs137054
																rs137055
																rs60999122
																rs137059
																rs370418403
																rs72487664
																rs137062
																rs137064
																rs140265136
																rs3752507
																rs137065
																rs137066
																rs137067
																rs137068
																rs137069
																rs137071
																rs145059817
																rs137073
																rs137075
																rs79212705
																rs74918063
																rs28693785
																rs9611823
																rs137077
																rs137078
																rs137079
																rs137080
																rs137083
																rs2285137
																rs137085
																rs137087
																rs2239811
																rs1043606
																rs137092
																rs137094
																rs5996194
																rs137097
																rs137098
																rs137099
																rs77542381
																rs137100
																rs73888342
																rs28417761
																rs137107
																rs60530807
																rs137111
																rs137112
																rs137116
																rs137117
																rs137122
																rs6002817
																rs137123
																rs137124
																rs2267449
																rs2018557
																rs743888
																rs2071843
																rs2071844
																rs137128
																rs137129
																rs137130
																rs137131
																rs137132
																rs137136
																rs137137
																rs2071846
																rs2267452
																rs2267453
																rs2267454
																rs737733
																rs2285138
																rs2285139
																rs5758820
																rs743889
																rs2071847
																rs6002829
																rs2299832
																rs2267455
																rs2267456
																rs5996199
																rs5758821
																rs5758822
																rs8190422
																rs8140318
																rs5758823
																rs5758824
																rs2285141
																rs5751315
																rs5751316
																rs78852336
																rs7287830
																rs6519327
																rs6519328
																rs7284660
																rs5758830
																rs8190413
																rs2267457
																rs734637
																rs763063
																rs5751319
																rs2284088
																rs1109585
																rs6002848
																rs916321
																rs2413707
																rs6002850
																rs2413708
																rs6002853
																rs8190393
																rs2284090
																rs8190385
																rs60631826
																rs8190368
																rs8190366
																rs28365957
																rs5996205
																rs11705171
																rs74761310
																rs5758833
																rs60685278
																rs11705269
																rs6002862
																rs3761461
																rs3827361
																rs5758835
																rs28699161
																rs28404399
																rs79153620
																rs5758837
																rs77394173
																rs73888349
																rs5758840
																rs5758842
																rs1009433
																rs5758843
																rs11090113
																rs11090114
																rs5751322
																rs12627948
																rs112490964
																rs34945863
																rs79173401
																rs5751323
																rs2858470
																rs11705003
																rs2858471
																rs130321
																rs78856866
																rs130322
																rs12628966
																rs130324
																rs130326
																rs130328
																rs2413709
																rs130329
																rs130330
																rs130331
																rs130332
																rs7286140
																rs2858469
																rs5758845
																rs35333574
																rs135093
																rs135094
																rs130333
																rs130334
																rs130335
																rs56375634
																rs8138985
																rs10427938
																rs130336
																rs7286131
																rs5758854
																rs5758856
																rs12628255
																rs5758857
																rs5758858
																rs130338
																rs5758859
																rs5758860
																rs73425294
																rs17003208
																rs61374197
																rs12627752
																rs130342
																rs130344
																rs130345
																rs130346
																rs5758863
																rs130347
																rs130350
																rs130360
																rs9306364
																rs130362
																rs9611839
																rs130364
																rs130365
																rs130367
																rs130368
																rs135097
																rs739024
																rs17003212
																rs135098
																rs130370
																rs130371
																rs130372
																rs130374
																rs130377
																rs130379
																rs5758865
																rs130380
																rs130382
																rs130383
																rs135100
																rs130384
																rs130385
																rs130387
																rs130388
																rs12628410
																rs130389
																rs130390
																rs59408849
																rs59356108
																rs732336
																rs736014
																rs736013
																rs2006304
																rs4334578
																rs739025
																rs2899361
																rs4822184
																rs5758866
																rs8142445
																rs28915391
																rs1053026
																rs3747193
																rs3747194
																rs9623659
																rs11541159
																rs3788594
																rs9611843
																rs130394
																rs78018648
																rs3761462
																rs130396
																rs3761464
																rs3761465
																rs12628541
																rs130399
																rs3761467
																rs8141906
																rs12628919
																rs11090115
																rs4822185
																rs28916570
																rs28916569
																rs77076498
																rs5758870
																rs5758871
																rs910301
																rs5758872
																rs910303
																rs13057708
																rs17485489
																rs5996224
																rs6002910
																rs5751341
																rs5758875
																rs5751342
																rs5751343
																rs5758881
																rs8141448
																rs8141461
																rs565379950
																rs577266849
																rs369002305
																rs7287103
																rs7286195
																rs7286214
																rs7285550
																rs9620084
																rs13055227
																rs13055886
																rs67194282
																rs67418653
																rs11704052
																rs11704081
																rs11704086
																rs5758886
																rs5758889
																rs8139858
																rs8139674
																rs5758890
																rs5758891
																rs5758893
																rs5758894
																rs8141536
																rs738526
																rs1883990
																rs8136914
																rs1883991
																rs738527
																rs11703455
																rs9620087
																rs9623671
																rs9620088
																rs5751348
																rs2143918
																rs13056962
																rs8138197
																rs8138149
																rs2143920
																rs5758895
																rs5758896
																rs5758897
																rs28908471
																rs28640172
																rs74946168
																rs28908469
																rs9620089
																rs28910285
																rs28910284
																rs5758898
																rs5751350
																rs8184980
																rs62238326
																rs9611850
																rs9623676
																rs34091628
																rs36060915
																rs5758899
																rs12166331
																rs6002928
																rs6002930
																rs5758901
																rs13054537
																rs5751352
																rs738528
																rs738529
																rs738530
																rs738531
																rs5758902
																rs2413712
																rs5751356
																rs5758905
																rs12628478
																rs12628772
																rs5751357
																rs4328732
																rs57880102
																rs12167537
																rs12167588
																rs8141918
																rs2413714
																rs9680786
																rs57946965
																rs5758906
																rs5758907
																rs5996230
																rs62238333
																rs4822191
																rs2143921
																rs2143922
																rs2143923
																rs62238334
																rs2413715
																rs8137312
																rs6519336
																rs2006041
																rs62238335
																rs6002938
																rs59171526
																rs1969673
																rs3927404
																rs7289434
																rs7292939
																rs5751359
																rs5758913
																rs6002944
																rs6002945
																rs6002946
																rs12166007
																rs28455106
																rs4820478
																rs11703374
																rs8142534
																rs7287569
																rs5758915
																rs12168327
																rs9623692
																rs5758916
																rs5758917
																rs7289099
																rs9611878
																rs5751360
																rs5751361
																rs6002948
																rs7286343
																rs67935361
																rs5758920
																rs5758921
																rs36116991
																rs56360850
																rs4822192
																rs5751363
																rs5758922
																rs10470280
																rs8139795
																rs55904876
																rs8140077
																rs12160525
																rs8141004
																rs6519342
																rs5751365
																rs5758927
																rs5758928
																rs12167804
																rs36076326
																rs35253449
																rs13056373
																rs7288045
																rs117473075
																rs62240077
																rs13053320
																rs13053216
																rs13053640
																rs13054887
																rs13053563
																rs11090118
																rs12628411
																rs12628492
																rs35450514
																rs13056081
																rs13053982
																rs62240105
																rs62240106
																rs67088109
																rs147538399
																rs738532
																rs13055920
																rs13055639
																rs9611895
																rs2064466
																rs4634034
																rs9607946
																rs13058238
																rs9623696
																rs12162975
																rs13057483
																rs9620095
																rs7284250
																rs139498009
																rs4239902
																rs62240107
																rs150233586
																rs9611898
																rs5758938
																rs5758941
																rs13057031
																rs13053289
																rs8138223
																rs1997885
																rs5758943
																rs4820483
																rs5751370
																rs4820484
																rs5751371
																rs9607948
																rs9607949
																rs34973372
																rs1984476
																rs2013730
																rs5758944
																rs5758945
																rs9611904
																rs9607952
																rs5751372
																rs4393836
																rs1807591
																rs1128013
																rs2179872
																rs5758951
																rs2413720
																rs2006040
																rs2413721
																rs2413722
																rs3946072
																rs2413723
																rs2413724
																rs5996239
																rs4822200
																rs2413726
																rs738535
																rs5751375
																rs1018448
																rs8139278
																rs5758954
																rs4820485
																rs8141000
																rs8141176
																rs1985714
																rs4820486
																rs17003362
																rs5758956
																rs5758957
																rs8140272
																rs5758961
																rs5758962
																rs5758965
																rs1807592
																rs4822201
																rs5751381
																rs5758967
																rs5758968
																rs5758969
																rs5758970
																rs5996242
																rs67192317
																rs9607961
																rs5758972
																rs5758975
																rs5758976
																rs201517462
																rs12165372
																rs2746974
																rs4822202
																rs9611930
																rs5758977
																rs5751383
																rs8136252
																rs738534
																rs4820487
																rs4822203
																rs5758978
																rs5751385
																rs4820490
																rs5758980
																rs4822204
																rs5758981
																rs5751386
																rs6002963
																rs6002964
																rs3788599
																rs5758985
																rs2899364
																rs5758986
																rs5758987
																rs5758988
																rs7364130
																rs5758989
																rs5751388
																rs5758990
																rs1983647
																rs9607968
																rs9607969
																rs9607970
																rs4822207
																rs5758994
																rs5758995
																rs5751390
																rs6002966
																rs738536
																rs4822208
																rs5751391
																rs5751392
																rs79314209
																rs5758997
																rs7287107
																rs5758999
																rs5759000
																rs5759002
																rs5751393
																rs4822210
																rs5759003
																rs7074
																rs7073
																rs8569
																rs4822211
																rs4822212
																rs13433641
																rs9607973
																rs2267460
																rs2267461
																rs2092664
																rs4822213
																rs2092665
																rs2092666
																rs2006042
																rs2007395
																rs2284091
																rs5751397
																rs4822215
																rs5759007
																rs9611950
																rs9611951
																rs2073199
																rs4820492
																rs4822216
																rs738537
																rs5759010
																rs4822217
																rs2899365
																rs9611953
																rs4822218
																rs2273143
																rs738538
																rs2267462
																rs4374465
																rs9611954
																rs9607978
																rs5751399
																rs7288133
																rs5759012
																rs12166809
																rs2076157
																rs5759013
																rs2076158
																rs4822220
																rs3091382
																rs5759015
																rs2413727
																rs2413728
																rs2413729
																rs2413730
																rs4588289
																rs2077446
																rs760772
																rs4822223
																rs875629
																rs738397
																rs2002595
																rs6519349
																rs5759017
																rs9611957
																rs7285844
																rs5759018
																rs6002971
																rs2267464
																rs4822224
																rs5759019
																rs1076118
																rs2267465
																rs9611959
																rs2092208
																rs5759021
																rs5759022
																rs732439
																rs2017874
[truncated: 410 more rows]
